# Supplementary material for: Synthesis of Isoxazolopyridines and Spirooxindoles under Ultrasonic Irradiation and Evaluation of Their Antioxidant Activity
Source: Hindawi journal article supplement (doi:10.1155/2017/9161505), 2017-01-01

## Supplementary Material

### Synthesis of Isoxazolopyridines and Spirooxindoles under Ultrasonic Irradiation and Evaluation of their Antioxidant Activity

Emel Pelit<sup>1,\*</sup>

<sup>1</sup>Kirklareli University, Faculty of Art and Sciences, Department of Chemistry, Kayali Campus, 39100, Kirklareli, Turkey

Correspondence should be addressed to Emel Pelit; [epelit@klu.edu.tr](mailto:epelit@klu.edu.tr)

Compound 4b <sup>1</sup>H NMR

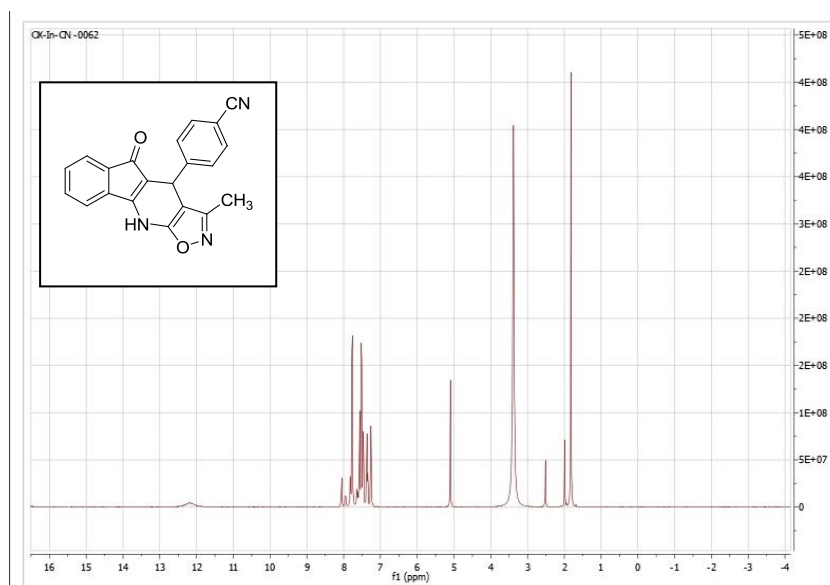

Compound 4b APT NMR

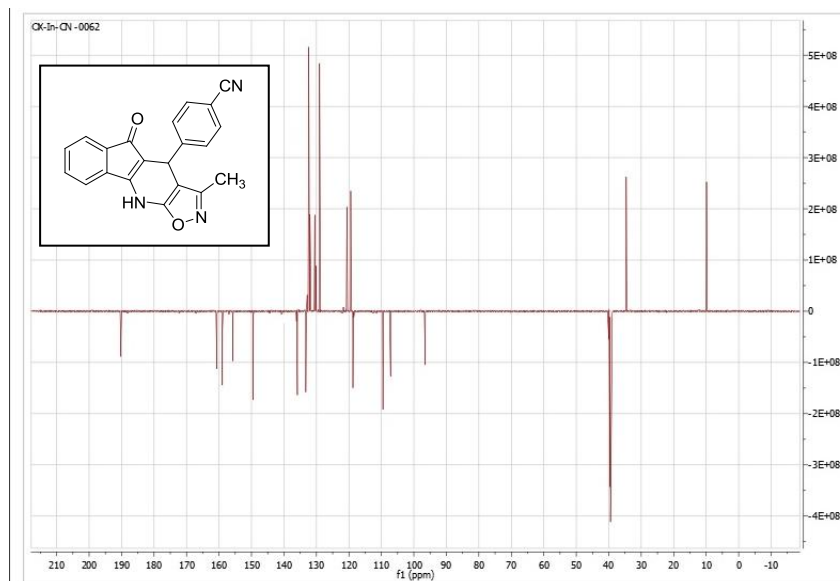

## Compound 4c $^1\text{H}$ NMR

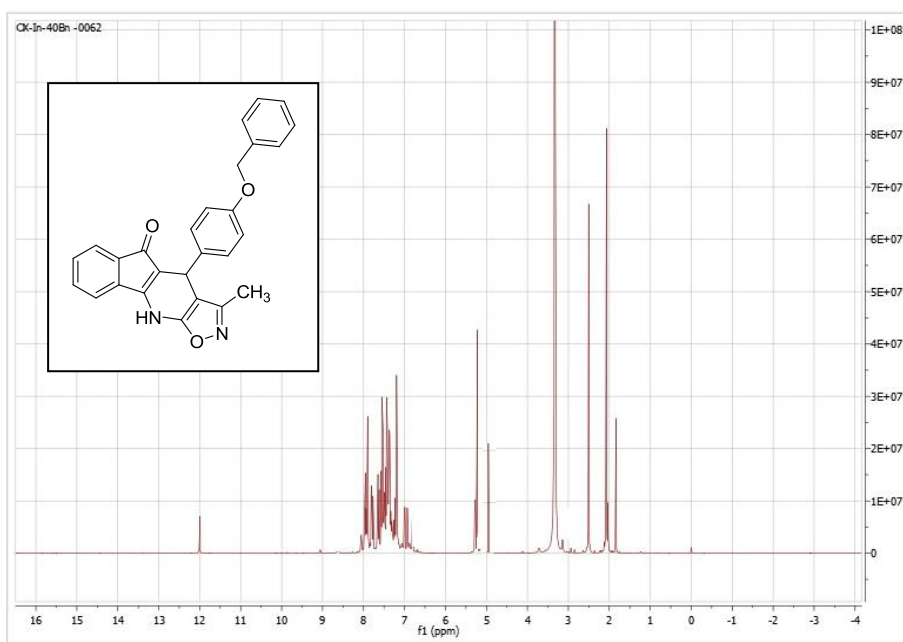

## Compound 4c APT NMR

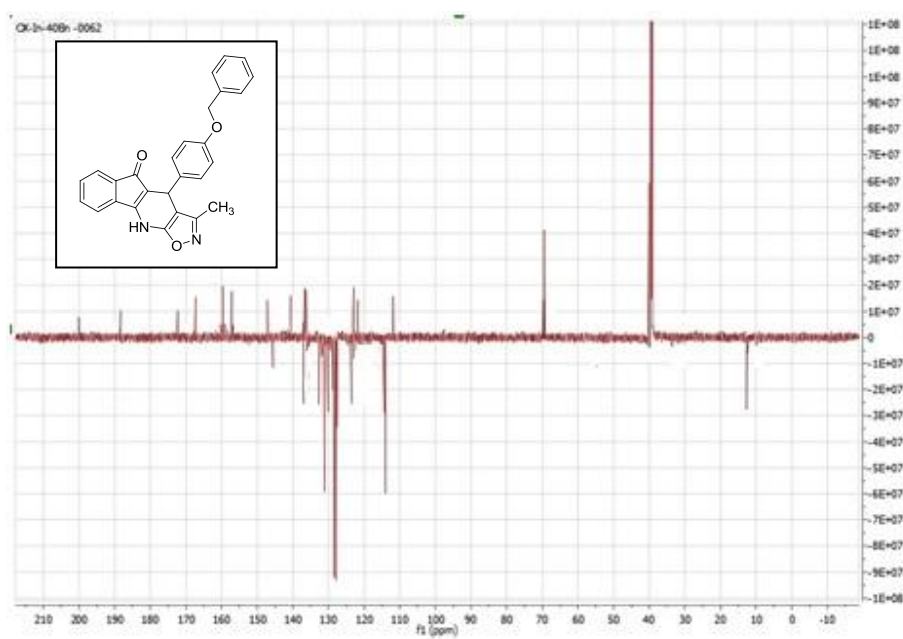

## Compound 4e $^1\text{H}$ NMR

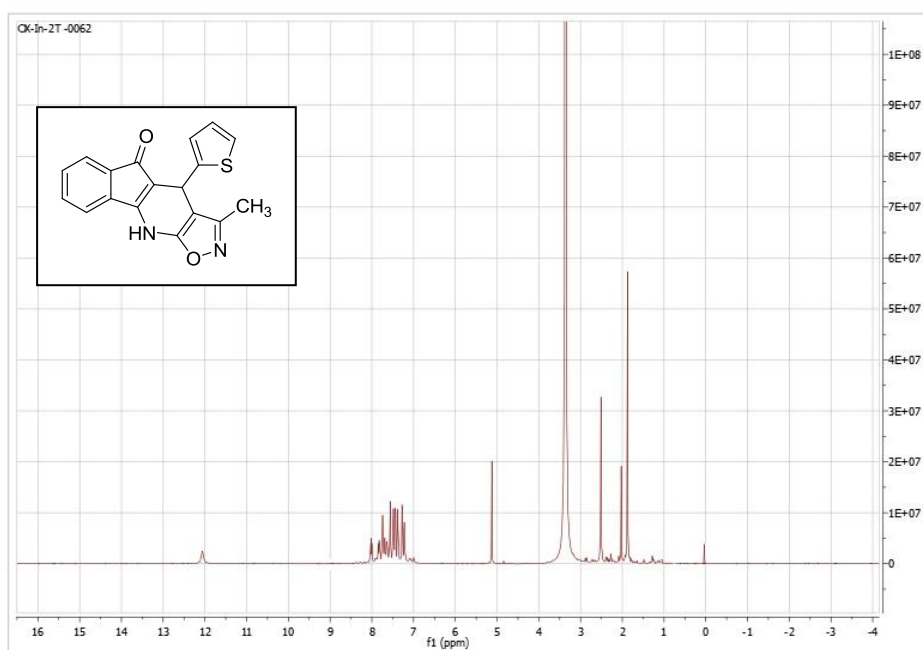

## Compound 4e APT NMR

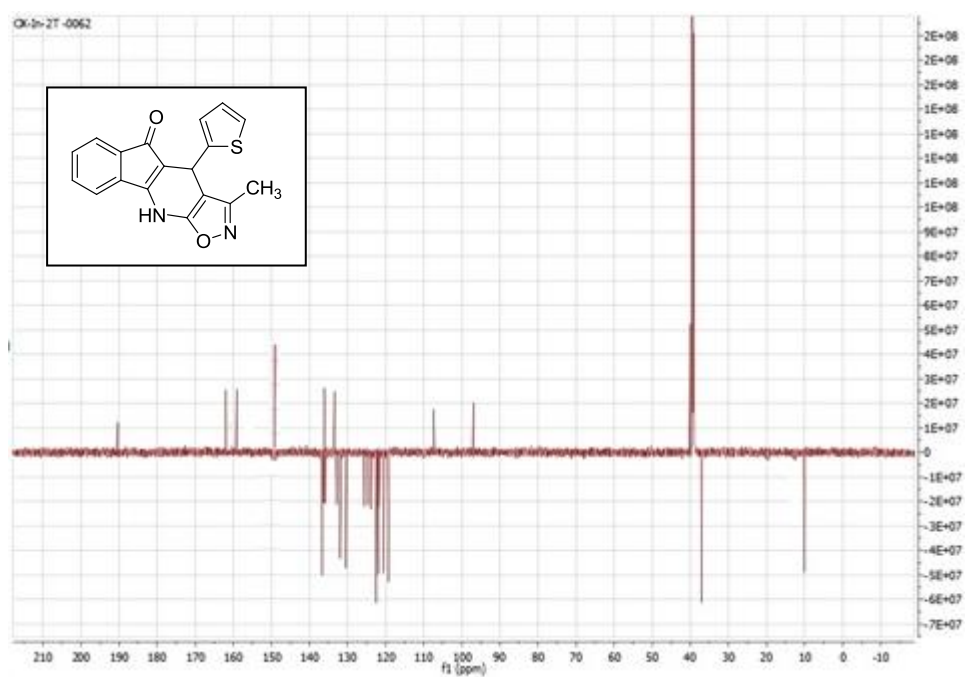

## Compound 5f $^1\text{H}$ NMR

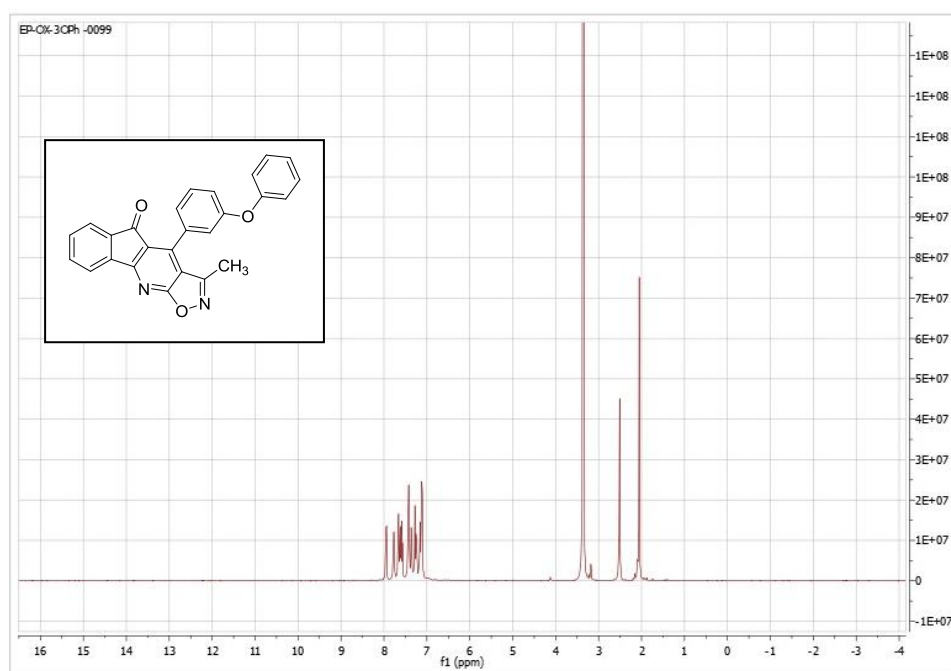

## Compound 5f APT NMR

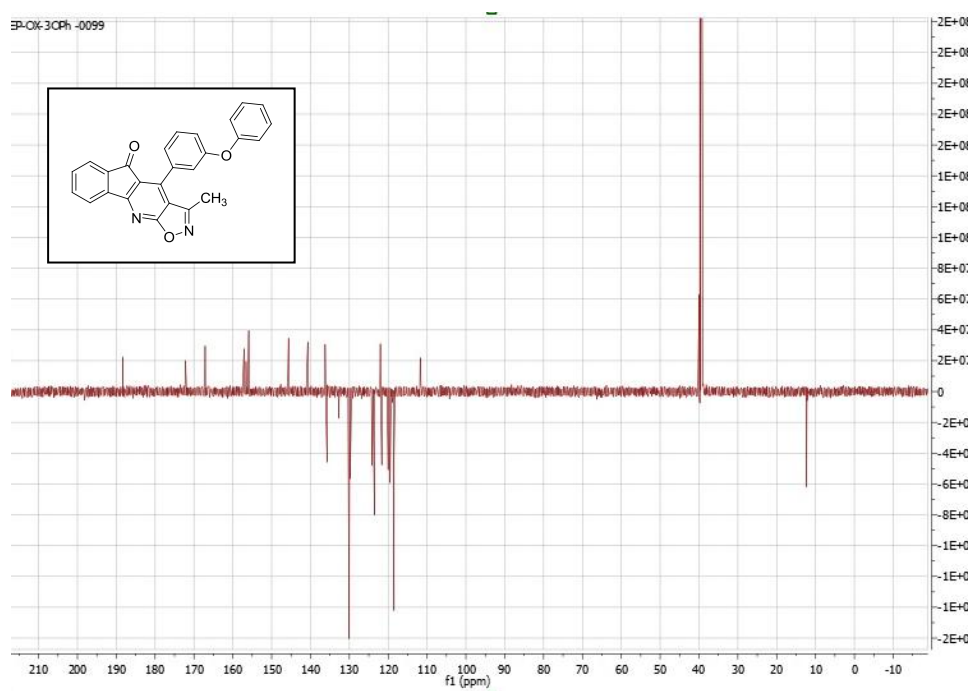

## Compound 5h $^1\text{H}$ NMR

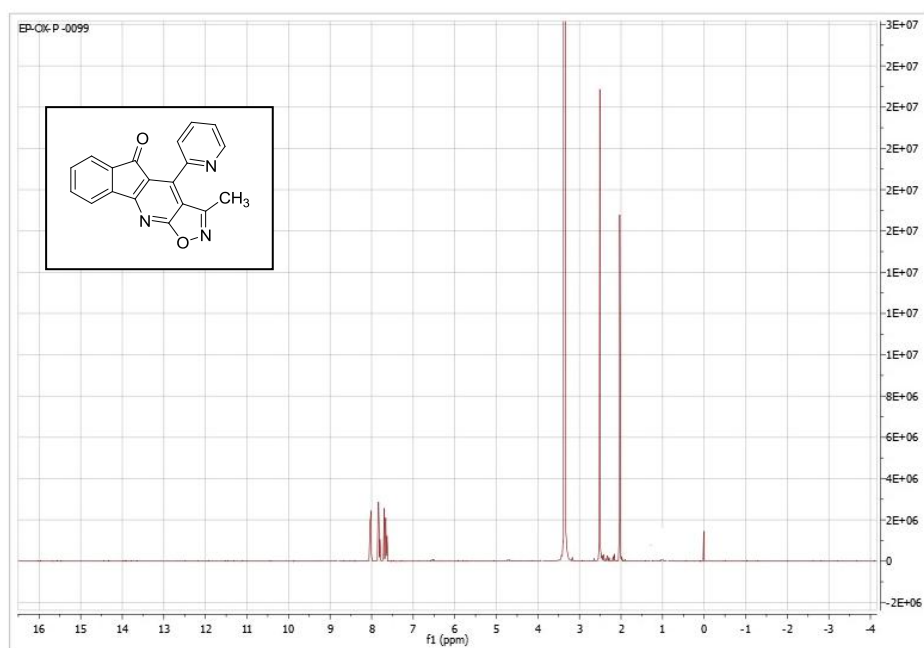

## Compound 5h APT NMR

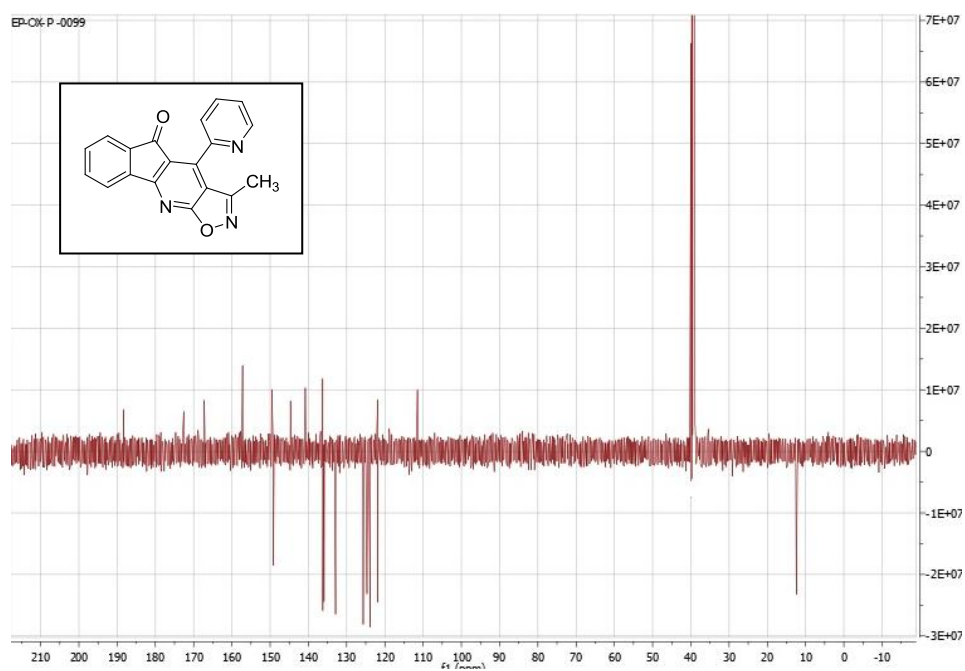

## Compound 8a $^1\text{H}$ NMR

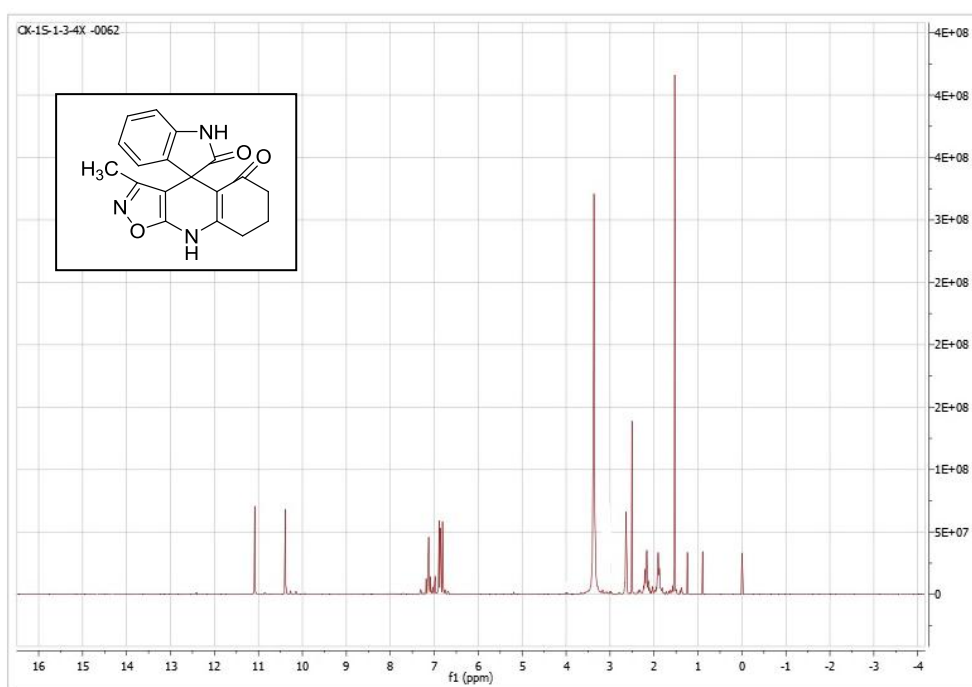

## Compound 8a APT NMR

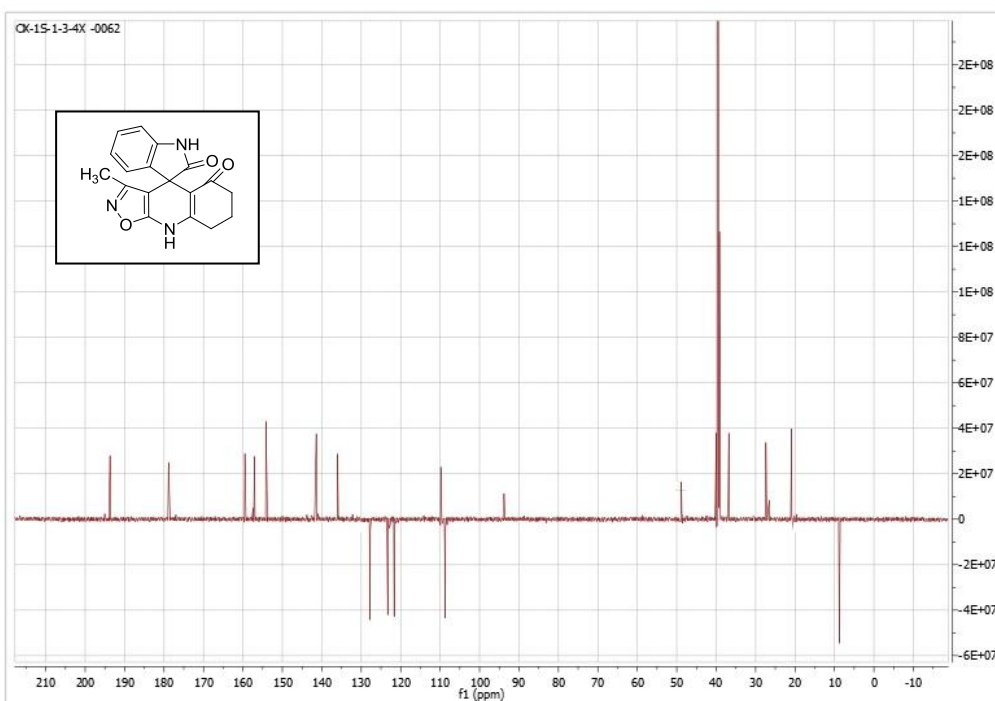

## Compound 8d $^1\text{H}$ NMR

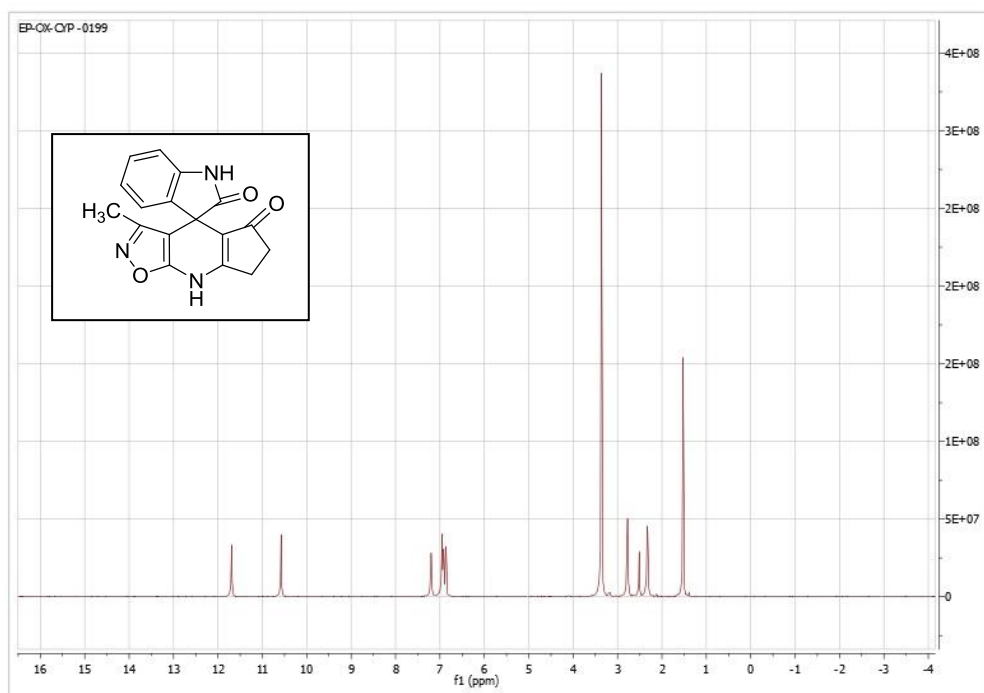

## Compound 8d APT NMR

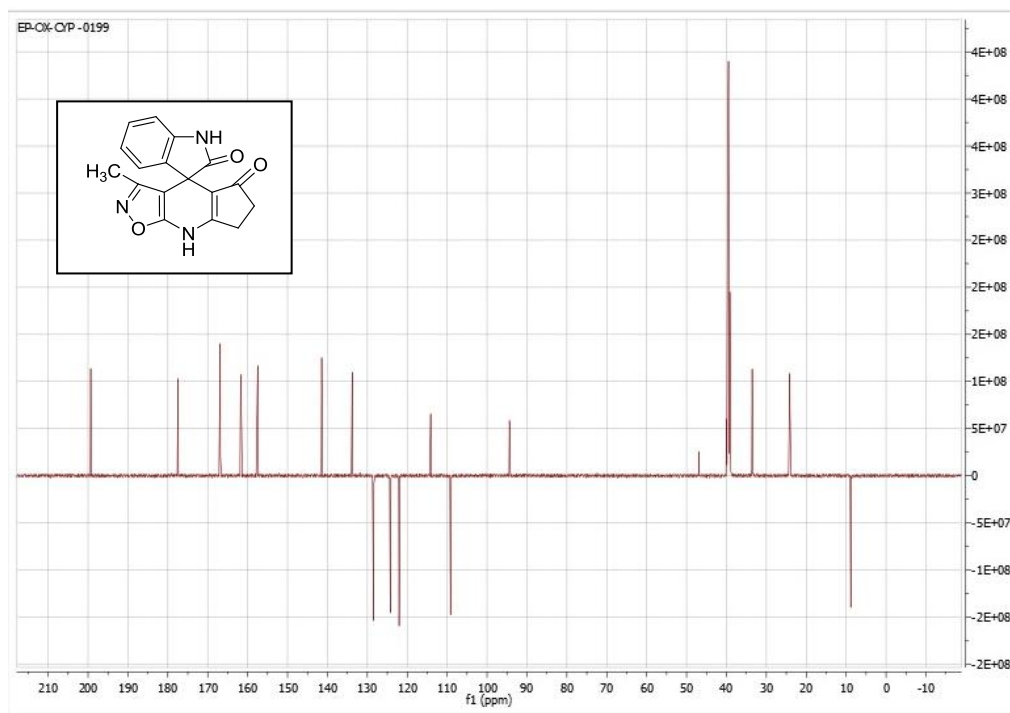

## MS spectrum

### Compound 4a

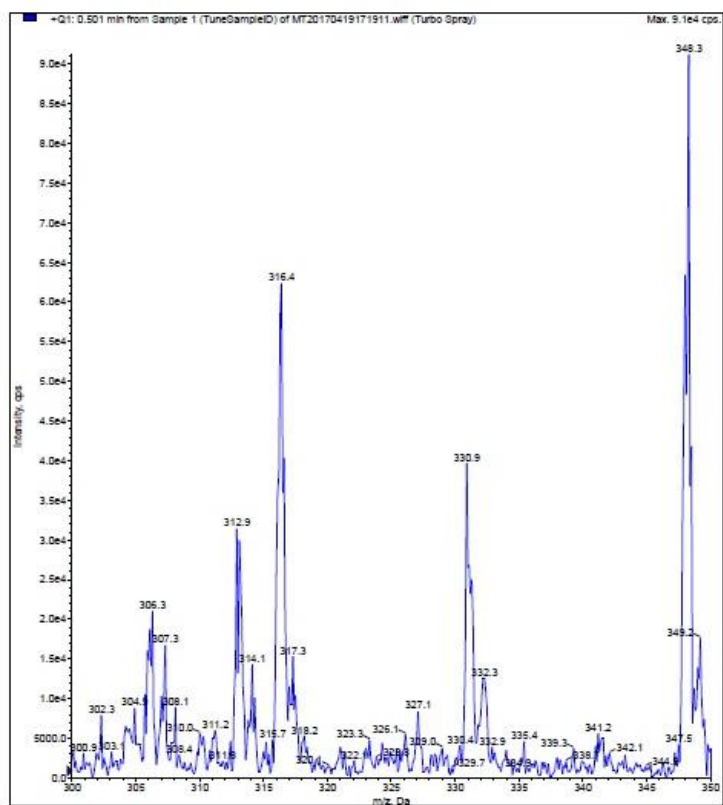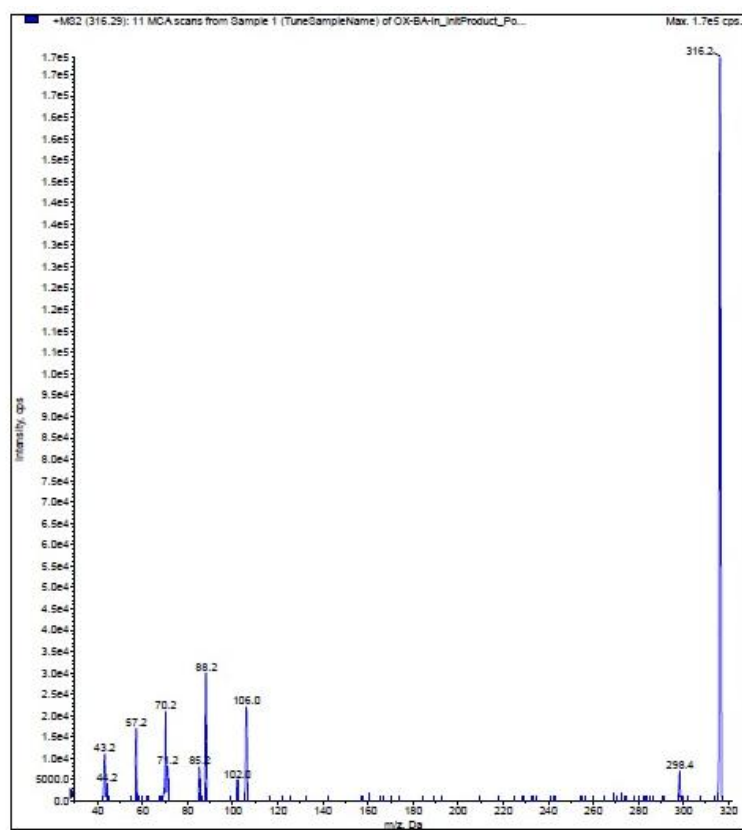



## Compound 4b

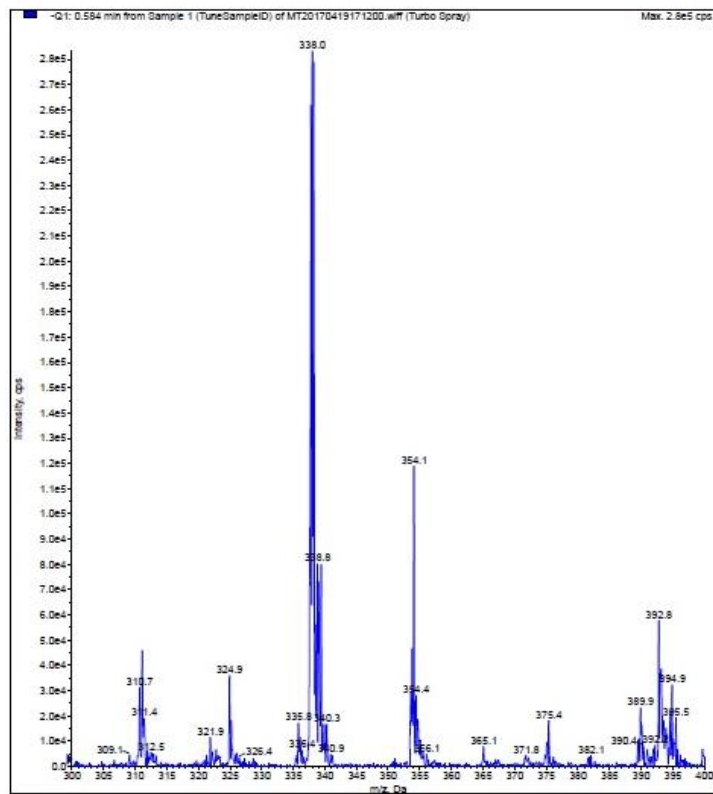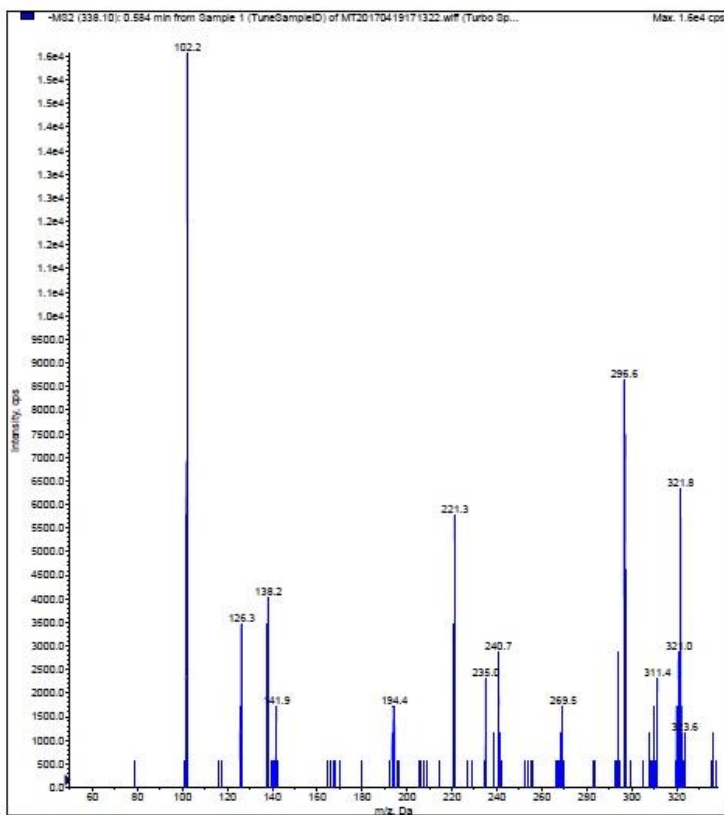

# Compound 5f

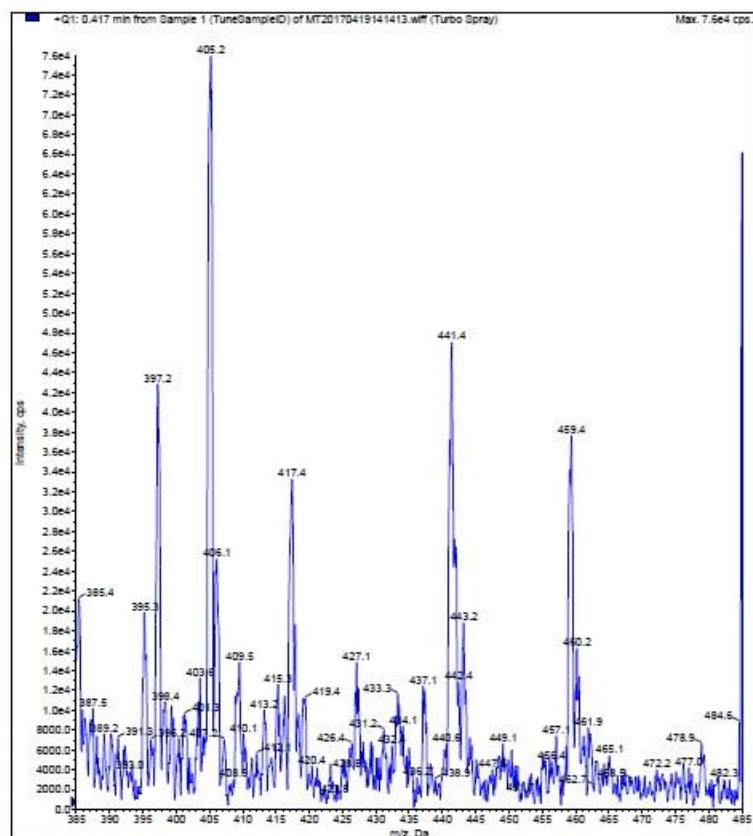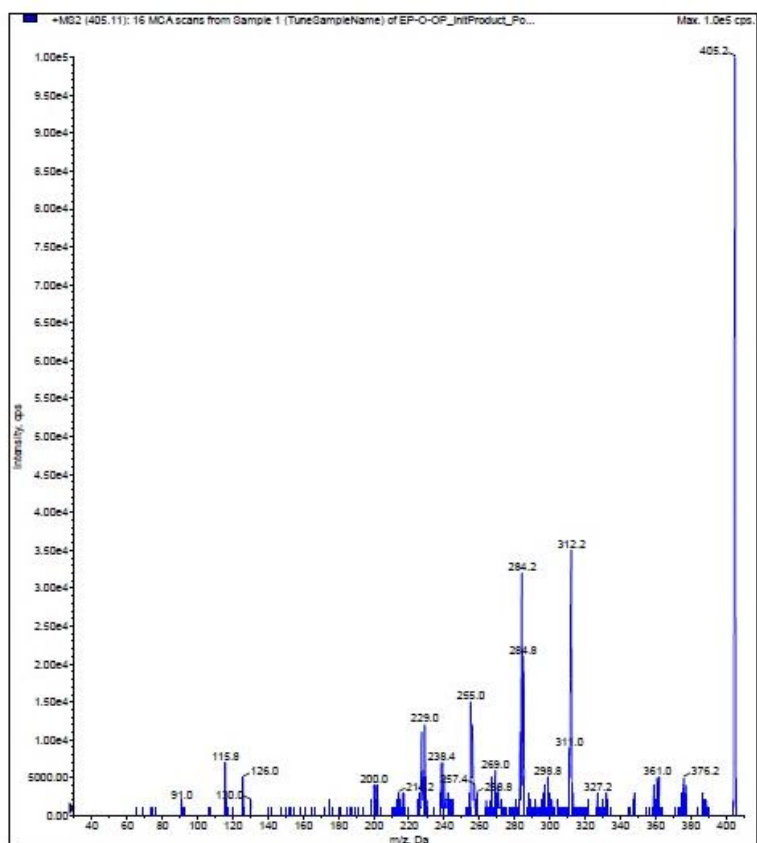

## Compound 5h

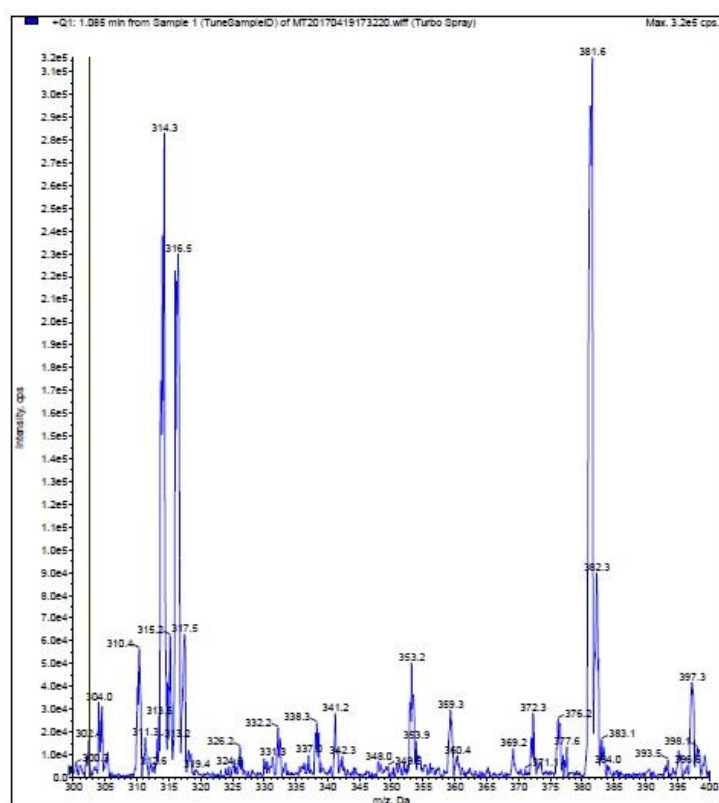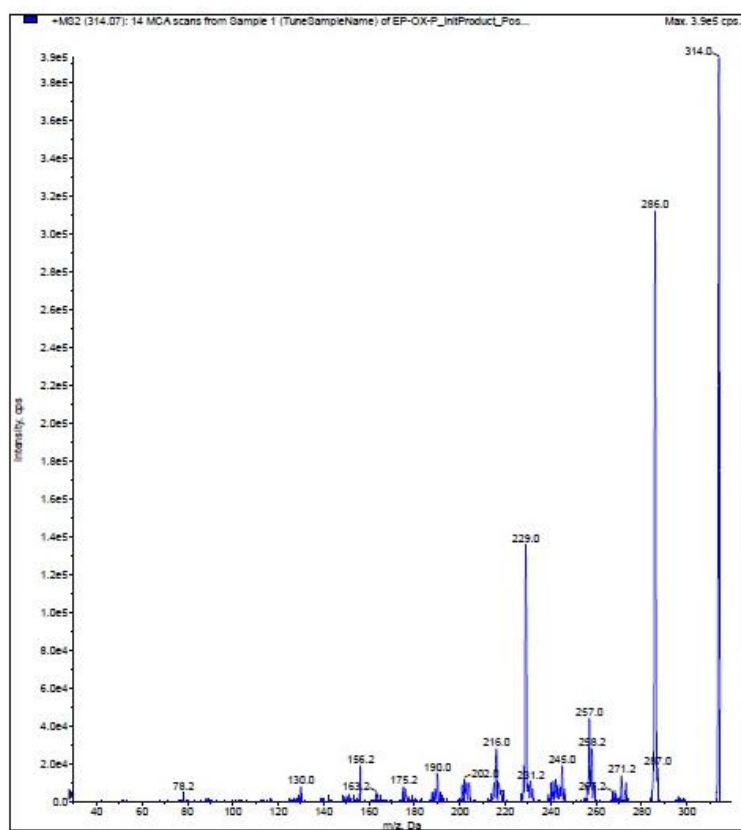

## Compound 8b

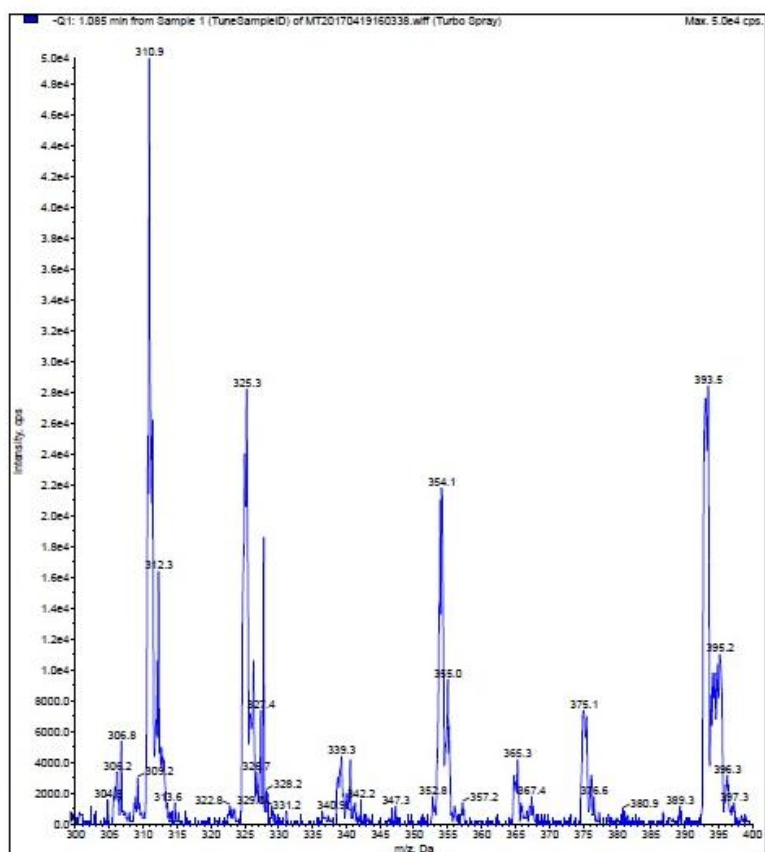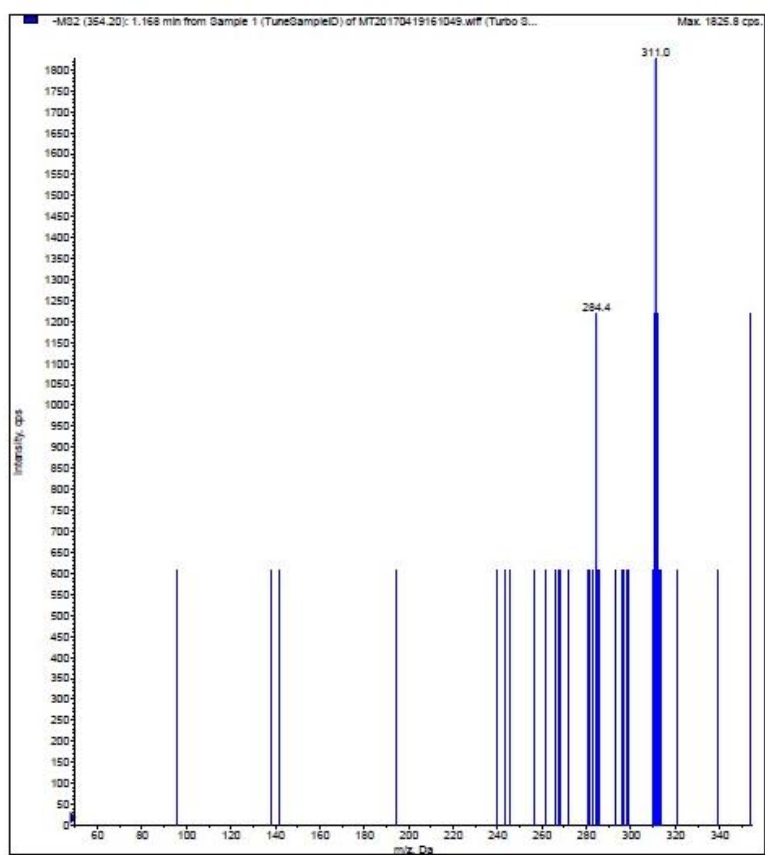

## Compound 8c

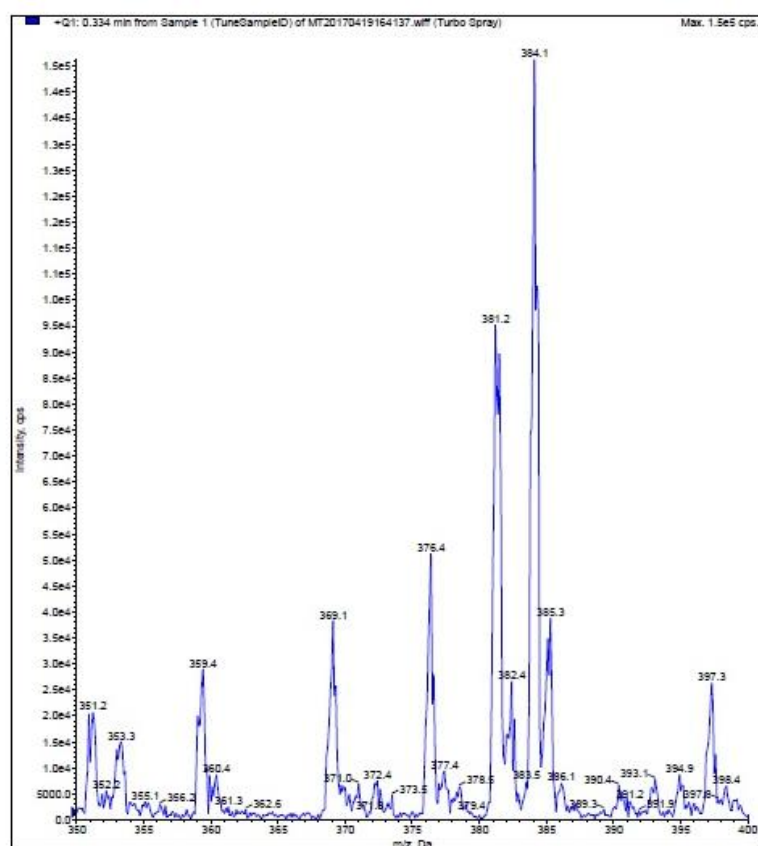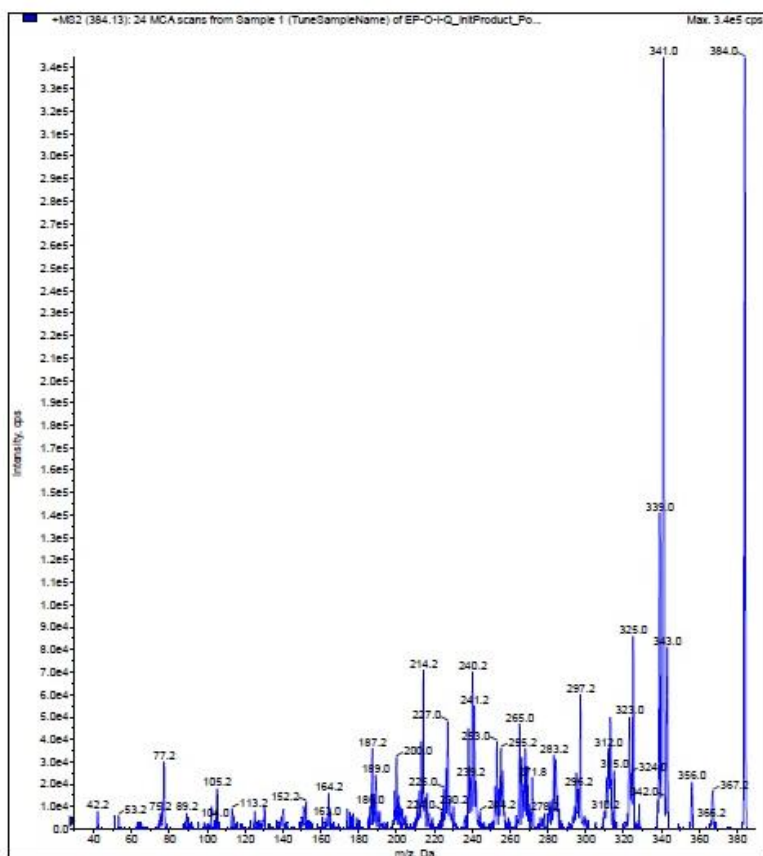

Supplement: f1 [file 9161505.f1.pdf]
